# Supplementary material for: A meta-analysis and systematic review of randomized controlled trials in combination Gemcitabine with Erlotinib in the pancreatic cancer
Source: Research Square preprint supplement (doi:10.21203/rs.3.rs-3535218/v1), 2023-11-11
Supplement: Supplementary file 2 [file 43d935af81780211c44e404a.xlsx]

## Sheet: Sheet1
Detailed search strategy
Database	Search Details	Results	Time
Pubmed	((("Gemcitabine"[Mesh]) OR ((((((((((((((((((dFdCyd[Title/Abstract]) OR (2',2'-Difluoro-2'-Deoxycytidine[Title/Abstract])) OR (2'-Deoxy-2'-Difluorocytidine[Title/Abstract])) OR (2' Deoxy 2' Difluorocytidine[Title/Abstract])) OR (2',2'-Difluorodeoxycytidine[Title/Abstract])) OR (2',2'-DFDC[Title/Abstract])) OR (Gemicitabine[Title/Abstract])) OR (Gemcitabine, (beta-D-threo-pentafuranosyl)-Isomer[Ti…	279 studies	10:00:00
Web of science	TS=(Gemcitabine) OR (((((((((((((((((AB=(dFdCyd)) OR AB=(2',2'-Difluoro-2'-Deoxycytidine)) OR AB=(2'-Deoxy-2'-Difluorocytidine)) OR AB=(2' Deoxy 2' Difluorocytidine)) OR AB=(2',2'-Difluorodeoxycytidine)) OR AB=(2',2'-DFDC)) OR AB=(Gemicitabine)) OR AB=(Gemcitabine, (beta-D-threo-pentafuranosyl)-Isomer)) OR AB=(LY 188011)) OR AB=(188011, LY)) OR AB=(LY-188011)) OR AB=(Gemcitabine Hydrochloride)) O…	185 studies	18:30:00
Embase	gemcitabine:ab,ti OR dfdcyd:ab,ti OR '2,2 difluoro 2 deoxycytidine':ab,ti OR '2 deoxy 2 difluorocytidine':ab,ti OR '2,2 difluorodeoxycytidine':ab,ti OR '2,2 dfdc':ab,ti OR gemicitabine:ab,ti OR '188011, ly':ab,ti OR 'ly 188011':ab,ti OR 'gemcitabine hydrochloride':ab,ti OR 'hydrochloride, gemcitabine':ab,ti OR gemzar:ab,ti AND 'erlotinib hydrochloride':ab,ti OR 'hydrochloride, erlotinib':ab,ti OR…	643 stdies	19:20:00
Cochrane library	(Gemicitabine):ti,ab,kw OR (dFdCyd):ti,ab,kw OR (Gemicitabine):ti,ab,kw OR (LY 188011):ti,ab,kw OR (188011, LY):ti,ab,kw OR (LY-188011):ti,ab,kw OR (Gemcitabine Hydrochloride):ti,ab,kw OR (Hydrochloride, Gemcitabine):ti,ab,kw OR (Gemzar):ti,ab,kw AND (Erlotinib Hydrochloride):ti,ab,kw OR (Hydrochloride, Erlotinib):ti,ab,kw OR (Erlotinib HCl):ti,ab,kw OR (HCl, Erlotinib):ti,ab,kw OR (OSI-774):ti,a…	65 studies	16:42:00
